# Supplementary material for: Opto-Current-Clamp Actuation of Cortical Neurons Using a Strategically Designed Channelrhodopsin
Source: PLOS journal article supplement (doi:10.1371/journal.pone.0012893), 2010-09-23
Supplement: S3 (10.1371/journal.pone.0012893.s003) [file journal.pone.0012893.s003]

**Figure S2**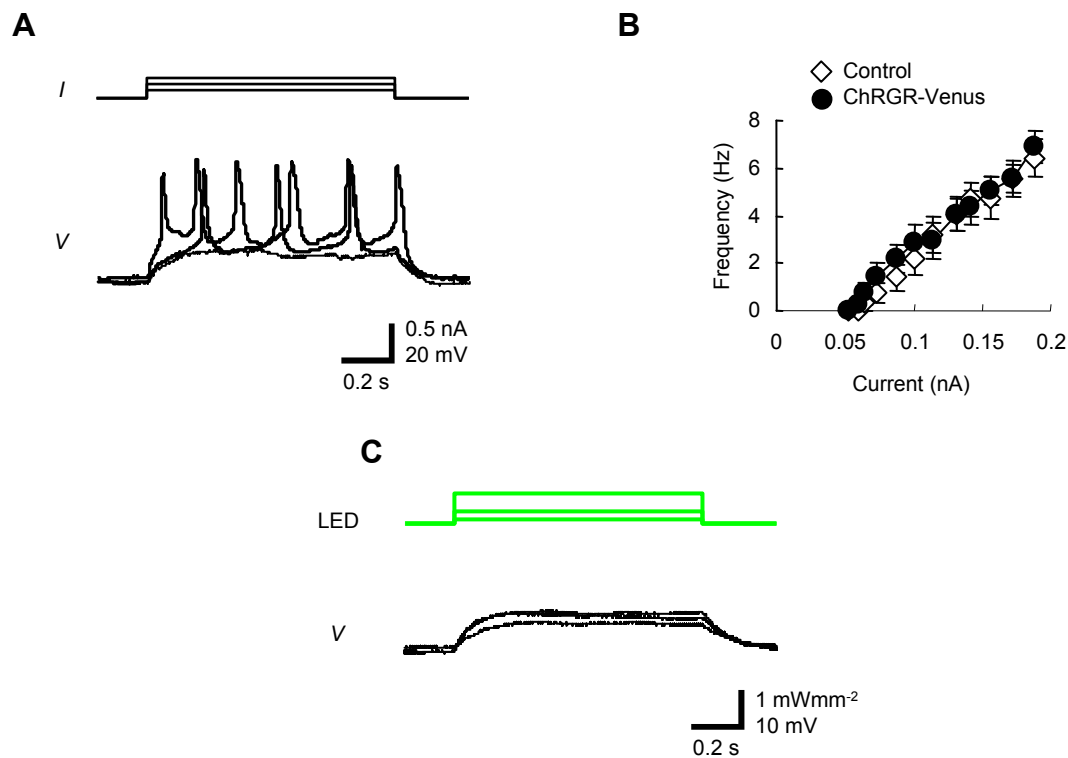

**Figure S2. Membrane properties of ChRGR-Venus-expressing neurons.** **A.** Membrane potential responses ( $V$ , bottom traces) to current injections from the patch electrode ( $I$ , top). **B.** Frequency of action potentials as a function of injected current; ChRGR-Venus-expressing neurons and non-expressing controls. **C.** Typical current-clamp responses ( $V$ , bottom traces) of a L5 pyramidal neuron to the green LED pulses (top). The external solution included 1  $\mu$ M TTX to suppress the generation of action potentials. The relationship between the light power density and the voltage change was non-linear because of the non-linear light power density-photocurrent relationship. The resting potential was -73 mV and the membrane time constant was 104 ms.
