# Supplementary material for: Opto-Current-Clamp Actuation of Cortical Neurons Using a Strategically Designed Channelrhodopsin
Source: PLOS journal article supplement (doi:10.1371/journal.pone.0012893), 2010-09-23
Supplement: S7 (10.1371/journal.pone.0012893.s007) [file journal.pone.0012893.s007]

**Figure S6**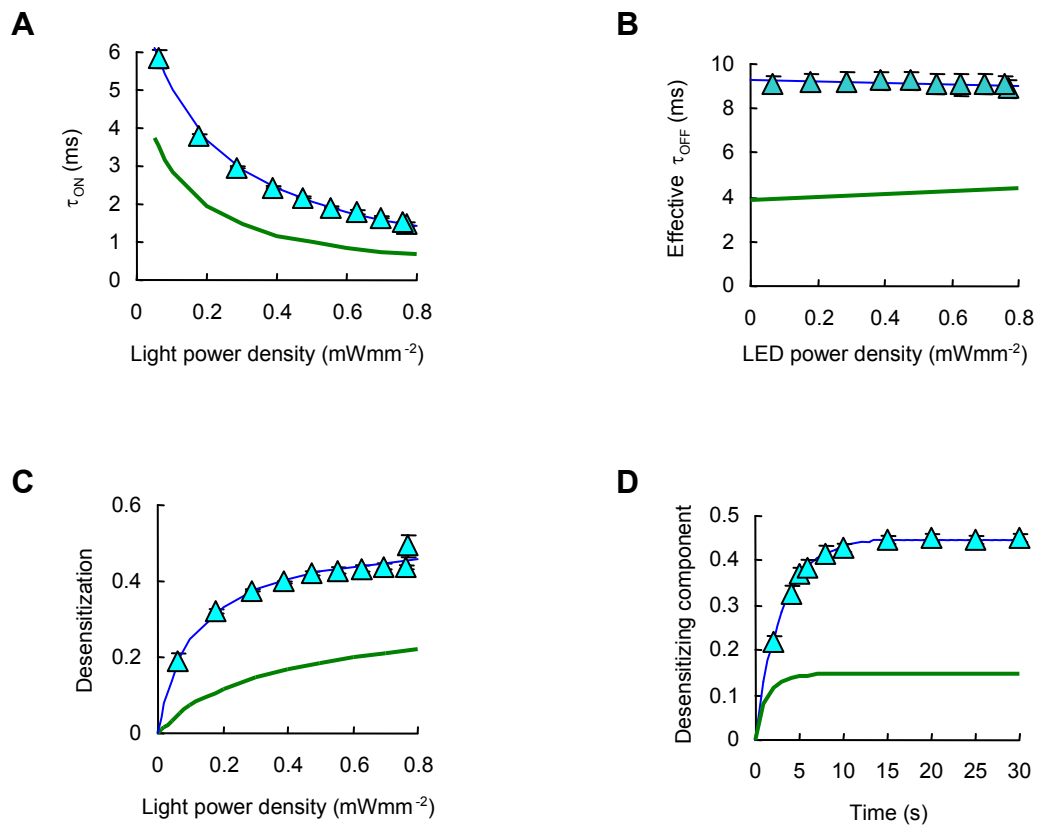

**Figure S6. Photocurrent kinetics of ChR2-H134R.** **A-C.** ChR2-H134R was expressed in a HEK cell and its photocurrent was evoked by 1s pulse of green LED of various strength (light blue triangle, mean and SEM). (A) The apparent ON time constant ( $\tau_{ON}$ )-light power density relationships. (B) The effective OFF time constant ( $\tau_{OFF}$ )-light power density relationships. (C) The desensitization-light power density relationships. **D.** The recovery time course of the desensitizing component. The process was fitted to a single exponential relationship (time constant, 3 s). Each green line is the relationship obtained from ChRGR that is copied from text-Figure 2D-F or 2J.
